# Supplementary material for: Multi-antenna techniques for interference mitigation in GNSS signal acquisition
Source: Springer Nature journal article supplement (doi:10.1186/1687-6180-2013-143), 2013-09-03

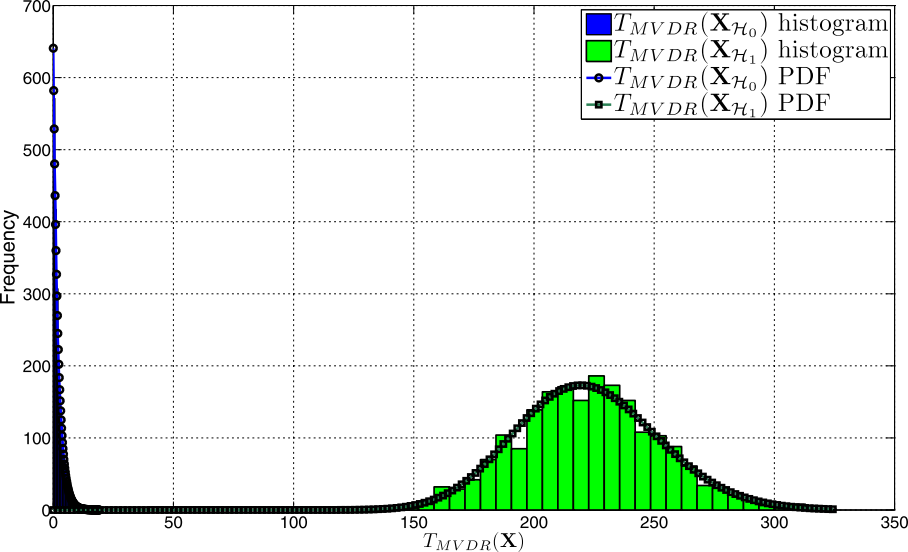

Supplement: 13634_2012_546_MOESM4_ESM.pdf [file 13634_2012_546_MOESM4_ESM.pdf]
